# Supplementary material for: Extreme strontium concentrations reveal specific biomineralization pathways in certain coccolithophores with implications for the Sr/Ca paleoproductivity proxy
Source: PLoS One. 2017 Oct 16;12(10):e0185655. doi: 10.1371/journal.pone.0185655 (PMC5642888; doi:10.1371/journal.pone.0185655)
Supplement: S1 Table — (XLSX) [file pone.0185655.s004.xlsx]

## Sheet: Feuil1
S1 Table. Standard materials used in the present study to establish a wt.% Sr/Ca to molar Sr/Ca ratios.
Standard	Mineralogy	Mean Sr/Ca	Sr/Ca	Sr/Ca
		(wt.%/wt.%)	(g/g)	(mmol/mol)
Spath	Calcite	6.76E-04	4.87E-06	2.23E-03
Nacre	Aragonite	0.006	0.0024	1.079
Aragonite	Aragonite	0.006	0.006	2.581
Chiton	Calcite	0.015	0.0157	7.178
Oolith	Calcite	0.024	0.0227	10.145
Coral	Aragonite	0.024	0.0167	7.434
Halimeda sp.	Calcite	0.0254	0.0227	10.265
Strontianite	Strontianite	12.572	11.991	5489.031
